# Supplementary material for: Sensitive Detection of Minimal Residual Disease in Patients Treated for Early-Stage Breast Cancer
Source: Oxford University Press journal article supplement (doi:10.1158/1078-0432.ccr-19-3005), 2020-03-13
Supplement: 10780432ccr193005-sup-228957_3_supp_6083182_q5w5q2.docx [file 10780432ccr193005-sup-228957_3_supp_6083182_q5w5q2.docx]

**SUPPLEMENTARY TABLES**

**Ultrasensitive detection of minimal residual disease: methods and application to patients treated for early-stage breast cancer**

Supplementary Tables: 3

**Supplementary Table 1.** Patient-level clinicopathologic data.

| **Study ID** | **Age at Diagnosis** | **Tumor Grade** | **Stage** | **ER Status** | **HER2 Status** | **Distant Recurrence** | **Time from Surgery to Relapse (days)** | **Visceral** | **Non-visceral** |
| --- | --- | --- | --- | --- | --- | --- | --- | --- | --- |
| 05055_2 | 58 | 3 | 3 | + | - | Yes | 3570 | Yes |  |
| 05055_3 | 40 | 2 | 3 | - | - | No | NA |  |  |
| 05055_4 | 41 | 1 | 3 | + | - | No | NA |  |  |
| 05055_5 | 30 | 1 | 2 | + | - | Yes | 824 | Yes |  |
| 05055_9 | 63 | NA | 2 | + | - | No | NA |  |  |
| 05055_11 | 35 | 2 | 2 | + | - | Yes | 2877 | Yes |  |
| 05055_17 | 64 | NA | 3 | + | - | No | NA |  |  |
| 05055_18 | 50 | 1 | 3 | + | - | No | NA |  |  |
| 05055_19 | 54 | 3 | 2 | - | - | No | NA |  |  |
| 05055_22 | 49 | NA | 2 | + | - | No | NA |  |  |
| 05055_23 | 52 | 3 | 3 | - | - | No | NA |  |  |
| 05055_26 | 67 | NA | 2 | + | - | No | NA |  |  |
| 05055_31 | 51 | NA | 2 | + | - | No | NA |  |  |
| 05055_32 | 55 | 1 | 3 | + | - | No | NA |  |  |
| 05055_33 | 34 | NA | 3 | + | - | Yes | 777 |  | Yes |
| 05055_46 | 44 | 3 | 3 | - | - | No | NA |  |  |
| 05055_48 | 50 | NA | 2 | + | - | No | NA |  |  |
| 05055_49 | 47 | 3 | 2 | - | - | No | NA |  |  |
| 05055_52 | 67 | NA | 3 | + | - | No | NA |  |  |
| 05055_54 | 59 | 3 | 2 | - | - | No | NA |  |  |
| 05055_57 | 44 | 3 | 2 | - | - | No | NA |  |  |
| 05055_69 | 52 | NA | 3 | + | - | No | NA |  |  |
| 05055_70 | 55 | 2 | 3 | + | - | No | NA |  |  |
| 05055_73 | 48 | NA | 3 | - | + | Yes | 624 |  | Yes |
| 05055_78 | 39 | NA | 3 | + | + | Yes | 637 |  |  |
| 05055_81 | 32 | NA | 2 | + | - | Yes | NA |  | Yes |
| 05055_88 | 48 | 3 | 3 | + | - | No | NA |  |  |
| 05055_92 | 57 | NA | 2 | + | - | No | NA |  |  |
| 05055_93 | 45 | 2 | 3 | - | - | Yes | 633 |  | Yes |
| 05055_94 | 68 | NA | 3 | + | - | No | NA |  |  |
| 05055_95 | 48 | NA | 3 | + | - | Yes | 907 |  | Yes |
| 05055_106 | 53 | 3 | 2 | + | - | Yes | 690 |  |  |
| 05055_109 | 31 | NA | 3 | + | - | Yes | 456 |  | Yes |
| 05055_110 | 66 | NA | 2 | + | - | No | NA |  |  |
| 05055_119 | 71 | NA | 2 | + | - | No | NA |  |  |
| 05055_121 | 53 | NA | 2 | + | - | No | NA |  |  |
| 05055_123 | 41 | 3 | 3 | + | - | No | NA |  |  |
| 05055_124 | 52 | 3 | 3 | + | - | No | NA |  |  |
| 05055_126 | 58 | 2 | 3 | + | - | Yes | 959 |  | Yes |
| 05055_129 | 50 | 2 | 3 | + | - | Yes | 2001 |  |  |
| 05055_131 | 45 | NA | 2 | + | - | No | NA |  |  |
| 05055_135 | 46 | 2 | 3 | + | - | No | NA |  |  |
| 05055_136 | 25 | NA | 3 | + | - | Yes | 1298 |  | Yes |
| 05055_138 | 50 | 3 | 3 | - | - | Yes | 715 |  |  |
| 05055_141 | 47 | 2 | 2 | + | - | Yes | 947 |  | Yes |
| 05055_143 | 50 | 2 | 2 | + | - | Yes | 2645 | Yes |  |
| 05055_144 | 51 | 3 | 2 | + | - | Yes | 1562 | Yes |  |
| 05055_148 | 50 | NA | 2 | + | - | No | NA |  |  |
| 05055_150 | 40 | NA | 2 | - | - | No | NA |  |  |
| 05055_156 | 39 | 2 | 3 | + | - | Yes | 3971 |  |  |
| 05055_157 | 46 | NA | 3 | - | - | No | NA |  |  |
| YWBC_102 | 31 | 2 | 3 | + | - | No | NA |  |  |
| YWBC_1033 | 25 | 2 | 2 | + | - | No | NA |  |  |
| YWBC_1063 | 33 |  | 2 | - | - | No | NA |  |  |
| YWBC_1074 | 29 | 3 | 1 | + | + | No | NA |  |  |
| YWBC_1083 | 33 | 2 | 2 | + | - | No | NA |  |  |
| YWBC_1114 | 36 | 3 | 2 | + | - | No | NA |  |  |
| YWBC_1149 | 31 | 3 | 3 | + | - | Yes | 1790 | Yes |  |
| YWBC_115 | 34 | 2 | 2 | + | - | No | NA |  |  |
| YWBC_117 | 34 | 2 | 2 | + | - | No | NA |  |  |
| YWBC_119 | 35 | 2 | 1 | + | - | Yes | 2797 | Yes |  |
| YWBC_124 | 38 | 2 | 1 | + | + | No | NA |  |  |
| YWBC_14 | 33 | 2 | 2 | + | + | Yes | 1575 |  |  |
| YWBC_167 | 36 | 3 | 1 | + | - | Yes | 535 | Yes |  |
| YWBC_189 | 34 | 3 | 2 | + | + | Yes | 1203 |  | Yes |
| YWBC_202 | 34 | 3 | 1 | + | + | Yes | NA | Yes |  |
| YWBC_208 | 27 | 3 | 2 | - | - | No | NA |  |  |
| YWBC_21 | 29 | 3 | 2 | - | + | No | NA |  |  |
| YWBC_213 | 32 | 2 | 2 | + | + | No | NA |  |  |
| YWBC_228 | 33 | 2 | 2 | + | - | No | NA |  |  |
| YWBC_23 | 36 | 3 | 2 | - | - | No | NA |  |  |
| YWBC_244 | 35 | 3 | 2 | - | - | No | NA |  |  |
| YWBC_253 | 33 | 3 | 2 | + | - | No | NA |  |  |
| YWBC_26 | 34 | 3 | 1 | - | - | No | NA |  |  |
| YWBC_260 | 31 | 3 | 1 | - | - | No | NA |  |  |
| YWBC_27 | 36 | 3 | 1 | + | - | Yes | 1995 |  |  |
| YWBC_29 | 34 | 3 | 1 | + | - | Yes | 981 |  |  |
| YWBC_293 | 35 | 3 | 2 | + | + | No | NA |  |  |
| YWBC_300 | 34 | 3 | 3 | - | - | No | NA |  |  |
| YWBC_303 | 33 | 2 | 1 | + | + | No | NA |  |  |
| YWBC_309 | 31 | 2 | 1 | + | - | No | NA |  |  |
| YWBC_315 | 30 | 3 | 2 | - | - | Yes | 630 | Yes |  |
| YWBC_342 | 31 | 3 | 1 | + | - | Yes | 1125 | Yes |  |
| YWBC_359 | 35 | 3 | 1 | + | + | No | NA |  |  |
| YWBC_36 | 30 | 2 | 1 | + | - | Yes | 813 | Yes |  |
| YWBC_372 | 30 | 3 | 1 | - | - | No | NA |  |  |
| YWBC_38 | 36 | 3 | 2 | - | - | No | NA |  |  |
| YWBC_402 | 30 | 1 | 1 | + | - | No | NA |  |  |
| YWBC_406 | 33 | 2 | 1 | + | - | No | NA |  |  |
| YWBC_407 | 28 | 2 | 2 | + | - | No | NA |  |  |
| YWBC_412 | 35 | 2 | 2 | + | - | No | NA |  |  |
| YWBC_418 | 33 | 3 | 2 | - | - | No | NA |  |  |
| YWBC_453 | 34 | 2 | 2 | + | - | No | NA |  |  |
| YWBC_468 | 33 | 2 | 3 | + | - | No | NA |  |  |
| YWBC_475 | 27 | 2 | 1 | + | - | No | NA |  |  |
| YWBC_480 | 35 | 3 | 2 | + | + | Yes | 2932 | Yes |  |
| YWBC_481 | 35 | 3 | 3 | + | + | No | NA |  |  |
| YWBC_491 | 28 | 3 | 2 | + | - | No | NA |  |  |
| YWBC_493 | 30 | 3 | 2 | + | - | No | NA |  |  |
| YWBC_497 | 35 | 3 | 2 | + | + | No | NA |  |  |
| YWBC_527 | 31 | 3 | 2 | + | + | No | NA |  |  |
| YWBC_566 | 23 | 3 | 3 | + | - | No | NA |  |  |
| YWBC_578 | 33 | 3 | 2 | + | - | No | NA |  |  |
| YWBC_591 | 33 | 1 | 2 | + | - | No | NA |  |  |
| YWBC_61 | 36 | 3 | 2 | - | - | No | NA |  |  |
| YWBC_614 | 30 | 1 | 0 | + | - | No | NA |  |  |
| YWBC_64 | 33 | 2 | 2 | + | - | No | NA |  |  |
| YWBC_640 | 35 | 3 | 2 | + | + | No | NA |  |  |
| YWBC_642 | 35 | 3 | 1 | + | - | No | NA |  |  |
| YWBC_646 | 31 | 3 | 2 | + | + | No | NA |  |  |
| YWBC_653 | 31 | 3 | 3 | + | + | Yes | 477 | Yes |  |
| YWBC_663 | 35 | 3 | 2 | + | - | No | NA |  |  |
| YWBC_667 | 35 | 3 | 3 | + | + | No | NA |  |  |
| YWBC_669 | 35 | 3 | 2 | - | - | Yes | 602 |  |  |
| YWBC_686 | 34 | 2 | 3 | + | - | Yes | 2503 |  |  |
| YWBC_7 | 31 | 3 | 2 | - | - | No | NA |  |  |
| YWBC_710 | 30 | 2 | 2 | + | + | No | NA |  |  |
| YWBC_73 | 36 | 3 | 2 | + | - | No | NA |  |  |
| YWBC_749 | 32 | 3 | 3 | + | + | No | NA |  |  |
| YWBC_750 | 33 | 3 | 1 | + | + | No | NA |  |  |
| YWBC_760 | 31 | 3 | 1 | + | - | No | NA |  |  |
| YWBC_761 | 29 | 2 | 1 | + | - | No | NA |  |  |
| YWBC_774 | 35 | 3 | 2 | + | - | No | NA |  |  |
| YWBC_779 | 33 | 2 | 1 | + | - | No | NA |  |  |
| YWBC_786 | 34 | 3 | 1 | + | - | No | NA |  |  |
| YWBC_803 | 24 | 2 | 1 | + | - | No | NA |  |  |
| YWBC_807 | 37 | 2 | 2 | + | + | No | NA |  |  |
| YWBC_808 | 35 | 2 | 1 | + | - | No | NA |  |  |
| YWBC_809 | 34 | 3 | 3 | - | - | Yes | 308 |  |  |
| YWBC_813 | 31 | 2 | 1 | + | - | No | NA |  |  |
| YWBC_844 | 30 | 3 | 1 | - | - | No | NA |  |  |
| YWBC_857 | 27 | 3 | 1 | + | - | No | NA |  |  |
| YWBC_879 | 24 | 3 | 2 | - | - | Yes | 197 |  |  |
| YWBC_882 | 33 | 3 | 1 | + | - | No | NA |  |  |
| YWBC_883 | 25 | 3 | 1 | - | - | No | NA |  |  |
| YWBC_915 | 31 | 2 | 1 | + | - | No | NA |  |  |
| YWBC_928 | 35 | 3 | 2 | + | - | Yes | 1413 | Yes |  |
| YWBC_934 | 35 | 3 | 2 | - | - | No | NA |  |  |
| YWBC_94 | 32 | 2 | 2 | + | - | No | NA |  |  |
| YWBC_944 | 31 | 3 | 0 | - | + | No | NA |  |  |
| YWBC_950 | 35 | 3 | 0 | + | indeterminate | No | NA |  |  |
| YWBC_953 | 29 | 3 | 2 | - | - | No | NA |  |  |

**Supplementary Table 2.** Characteristics of the patients at baseline by MRD status. MRD-positive status indicates patients with at least one MRD-positive test.

| **Characteristic** | **Total (n=142)** | **MRD-negative (n=129)** | **MRD-positive (n=13)** | **p-value** |
| --- | --- | --- | --- | --- |
| **Age at diagnosis**  median(range) | 35 (23-71) | 35 (25-71) | 34 (24-53) | 0.1480 |
| **Subtype n(%)**  ER+  ER+/HER2+  HER2+  TNBC | 86 (61)  22 (15.49)  3(2.11)  31 (21.83) | 79(61.24)  21(16.28)  3(2.33)  26 (20.16) | 7(53.85)  1(7.69)  0(0)  5 (38.46) | 0.4262 |
| **Stage at diagnosis n(%)**  0  I  II  III | 3(2.11)  32(22.54)  68(47.89)  39(27.46) | 3(2.33)  28(21.71)  63(48.84)  35(27.13) | 0(0)  4(30.77)  5(38.46)  4(30.77) | 0.7879 |
| **Grade at diagnosis n(%)**  **1**  **2**  **3**  **NA** | 7 (4.93)  40(28.17)  70 (49.29)  24 (16.90) | 7 (5.4)  37 (28.7)  61 (47.3)  23 (17.8) | 0 (0)  3 (23.1)  9 (69.2)  1 (7.7) | 0.44 |
| **Adjuvant or Neo-adjuvant therapy n(%)**  **No**  **Yes**  **NE** | 11 (7.7)  130 (91.6)  1 (0.7) | 11 (8.5)  117 (90.7)  1 (0.8) | 0 (0)  13 (100)  0 (0) | 0.52 |
| **Endocrine Therapy n (%)**  **No**  **Yes** | 33 (23.4)  108 (76.6) | 28 (21.7)  100 (77.5) | 5 (38.5)  8 (61.5) | 0.18 |
| **Radiation n(%)**  **No**  **Yes** | 38 (26.8)  104 (73.2) | 36 (27.9)  93 (72.1) | 2 (15.4)  11 (84.6) | 0.33 |

**SupplementaryTable 3.** Lead Time. Time from a positive MRD test to clinical metastatic recurrence

| **Patient ID** | **Lead Time (Days)** | **Lead Time (Months)** |
| --- | --- | --- |
| **05055_106** | 228 | 7.6 |
| 05055_136 | 1177 | 39.2 |
| **05055_141** | 833 | 27.8 |
| **05055_93** | 524 | 17.5 |
| **YWBC_27** | 567 | 18.9 |
| **YWBC_29** | 918 | 30.6 |
| **YWBC_315** | 568 | 18.9 |
| **YWBC_342** | 1036 | 34.5 |
| **YWBC_809** | 102 | 3.4 |
| **YWBC_879** | 161 | 5.4 |

.
